# Supplementary material for: Nitrogen Fixation: Fixing the Gap between Concept- & Evidence-Based Learning with Legume Biology
Source: Oxford University Press journal article supplement (doi:10.1525/abt.2019.81.4.250), 2019-03-26
Supplement: abt.2019.81.4.250-f5.xlsx [file abt.2019.81.4.250-f5.xlsx]

## Sheet: Information
Nitrogen Fixation: Fixing the Gap between Concept and Evidence-Based Learning with Legume Biology
Christopher Krieg1,2,3*, Rebecca A Valls1,2, Sarah Vatland4, Jennifer Gordonier4, Stephanie S. Porter5, and Eric von Wettberg 1,2
The American Biology Teacher, 2017
1,4Florida International University, International Center for Tropical Botany, Miami, FL 33199
2Florida International University, Department of Biological Sciences, Miami, FL 33199
3University of Florida, Department of Biology, Gainesville, FL 32611
4Pine Crest School, Fort Lauderdale, FL 33334
5Washington State University Vancouver, Department of Biological Sciences, Vancouver, WA,
*Correspondence to: Christopher Krieg, ckrieg@ufl.edu
*,†,†† for author notes (such as corresponding author).

## Sheet: Sample Data
Plant	Seed	Soil	Treatment	Replicate	FiDeadl_Height (cm)	Final_Leaf_Count	Chlorophyll	Nodule_Count
7	Common_Bean	PC_Field	Autoclaved	1	13.8	2	14.1	0				Autoclaved	Natural
25	Common_Bean	PC_Field	Autoclaved	2	10.5	9	14.2	0			Nodules	16.4231	28.4118
43	Common_Bean	PC_Field	Autoclaved	3	12.225	NA	NA	0			Height	11.2056	13.7889
8	Medicago_Black_Medic	PC_Field	Autoclaved	1	4.725	81	46.1	0			Chl	24.505	30.1812
26	Medicago_Black_Medic	PC_Field	Autoclaved	2	3.9	57	11.6	0
44	Medicago_Black_Medic	PC_Field	Autoclaved	3	7.125	21	14.9	0
9	Medicago_Polymorpha	PC_Field	Autoclaved	1	8.25	87	9.8	6
27	Medicago_Polymorpha	PC_Field	Autoclaved	2	7.5	75	15.6	0
45	Medicago_Polymorpha	PC_Field	Autoclaved	3	7.5	21	31	0
4	Common_Bean	PC_Lake	Autoclaved	1	11.25	5	9.4	0
22	Common_Bean	PC_Lake	Autoclaved	2	11.025	NA	NA	0
40	Common_Bean	PC_Lake	Autoclaved	3	10.65	NA	NA	0
5	Medicago_Black_Medic	PC_Lake	Autoclaved	1	3	36	17.9	0
23	Medicago_Black_Medic	PC_Lake	Autoclaved	2	2.7	27	27	0
41	Medicago_Black_Medic	PC_Lake	Autoclaved	3	3.675	27	15.4	0
6	Medicago_Polymorpha	PC_Lake	Autoclaved	1	3.675	15	19.3	0
24	Medicago_Polymorpha	PC_Lake	Autoclaved	2	3.6	NA	NA	0
42	Medicago_Polymorpha	PC_Lake	Autoclaved	3	3.825	NA	NA	0
1	Common_Bean	USDA	Autoclaved	1	17.625	15	22.3	0
19	Common_Bean	USDA	Autoclaved	2	14.25	0	NA	0
37	Common_Bean	USDA	Autoclaved	3	21	19	29.6	0
2	Medicago_Black_Medic	USDA	Autoclaved	1	12.975	192	31.1	206
20	Medicago_Black_Medic	USDA	Autoclaved	2	17.7	315	46.4	155
38	Medicago_Black_Medic	USDA	Autoclaved	3	13.575	NA	NA	NA
3	Medicago_Polymorpha	USDA	Autoclaved	1	21.75	78	38.3	19
21	Medicago_Polymorpha	USDA	Autoclaved	2	31.5	84	38.3	30
39	Medicago_Polymorpha	USDA	Autoclaved	3	23.25	63	37.8	11
16	Common_Bean	PC_Field	Nonautoclaved	1	13.1	NA	NA	NA
34	Common_Bean	PC_Field	Nonautoclaved	2	12.5	3	13.6	11
52	Common_Bean	PC_Field	Nonautoclaved	3	15	15	21.3	7
17	Medicago_Black_Medic	PC_Field	Nonautoclaved	1	9.3	108	23.3	0
35	Medicago_Black_Medic	PC_Field	Nonautoclaved	2	7.8	57	26.7	0
53	Medicago_Black_Medic	PC_Field	Nonautoclaved	3	11.2	81	46.1	0
18	Medicago_Polymorpha	PC_Field	Nonautoclaved	1	5.4	12	29.7	6
36	Medicago_Polymorpha	PC_Field	Nonautoclaved	2	7.8	NA	NA	NA
54	Medicago_Polymorpha	PC_Field	Nonautoclaved	3	7.3	NA	NA	NA
13	Common_Bean	PC_Lake	Nonautoclaved	1	16.2	14	36.7	8
31	Common_Bean	PC_Lake	Nonautoclaved	2	17.1	NA	NA	NA
49	Common_Bean	PC_Lake	Nonautoclaved	3	17.3	NA	NA	NA
14	Medicago_Black_Medic	PC_Lake	Nonautoclaved	1	8	33	33	0
32	Medicago_Black_Medic	PC_Lake	Nonautoclaved	2	7.8	69	26.8	0
50	Medicago_Black_Medic	PC_Lake	Nonautoclaved	3	8	33	28.7	0
15	Medicago_Polymorpha	PC_Lake	Nonautoclaved	1	9.5	30	16.8	4
33	Medicago_Polymorpha	PC_Lake	Nonautoclaved	2	10.1	NA	NA	NA
51	Medicago_Polymorpha	PC_Lake	Nonautoclaved	3	10.2	NA	NA	NA
10	Common_Bean	USDA	Nonautoclaved	1	24	NA	NA	NA
28	Common_Bean	USDA	Nonautoclaved	2	30.1	NA	NA	NA
46	Common_Bean	USDA	Nonautoclaved	3	29.2	NA	NA	NA
11	Medicago_Black_Medic	USDA	Nonautoclaved	1	13.5	75	42.9	150
29	Medicago_Black_Medic	USDA	Nonautoclaved	2	25.5	180	35.9	102
47	Medicago_Black_Medic	USDA	Nonautoclaved	3	17.3	NA	NA	134
12	Medicago_Polymorpha	USDA	Nonautoclaved	1	17.1	81	35.6	48
30	Medicago_Polymorpha	USDA	Nonautoclaved	2	12.5	72	27.9	2
48	Medicago_Polymorpha	USDA	Nonautoclaved	3	9.5	66	37.9	11
